# Supplementary material
Source: PubMed Central journal article supplement (PMC548657)
Supplement: 7600552s1.pdf [file 7600552s1.pdf]

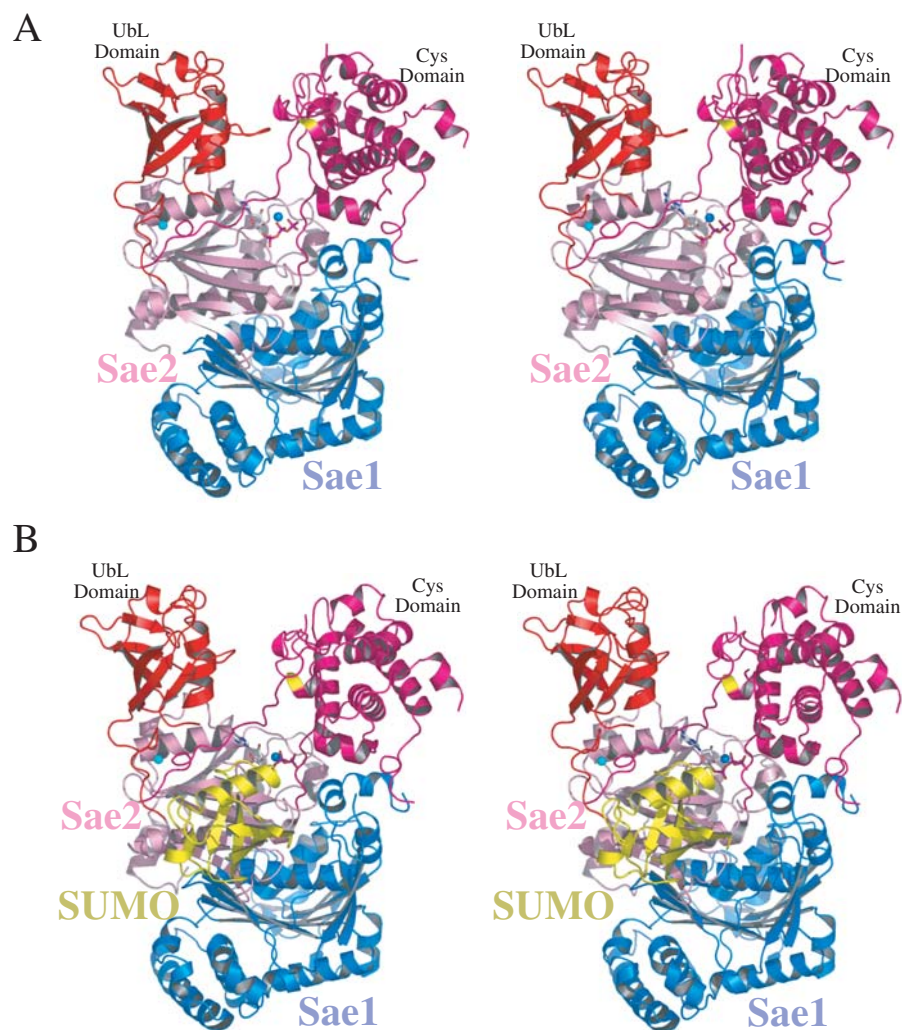

Supplemental Figure 1. A) Stereo representation and ribbon diagram of the Sae1/Sae2 heterodimer Mg·ATP complex. Sae1 is colored blue and Sae2 colored shades of pink, magenta, and red. B) Stereo representation and ribbon diagram of the Sae1/Sae2 heterodimer SUMO-1 Mg·ATP complex. Sae1 and Sae2 colored as in A with SUMO-1 colored yellow. Mg·ATP and zinc ions are indicated by dark and light blue spheres, respectively. The ATP ligand is shown in bond representation. Sae1, Sae2, and SUMO-1 are labeled. Sae2 catalytic Cys and UbL domains are labeled. The position of the active site cysteine is colored yellow within the catalytic Cys domain.
