# Supplementary material
Source: PubMed Central journal article supplement (PMC548657)
Supplement: 7600552s2.pdf [file 7600552s2.pdf]

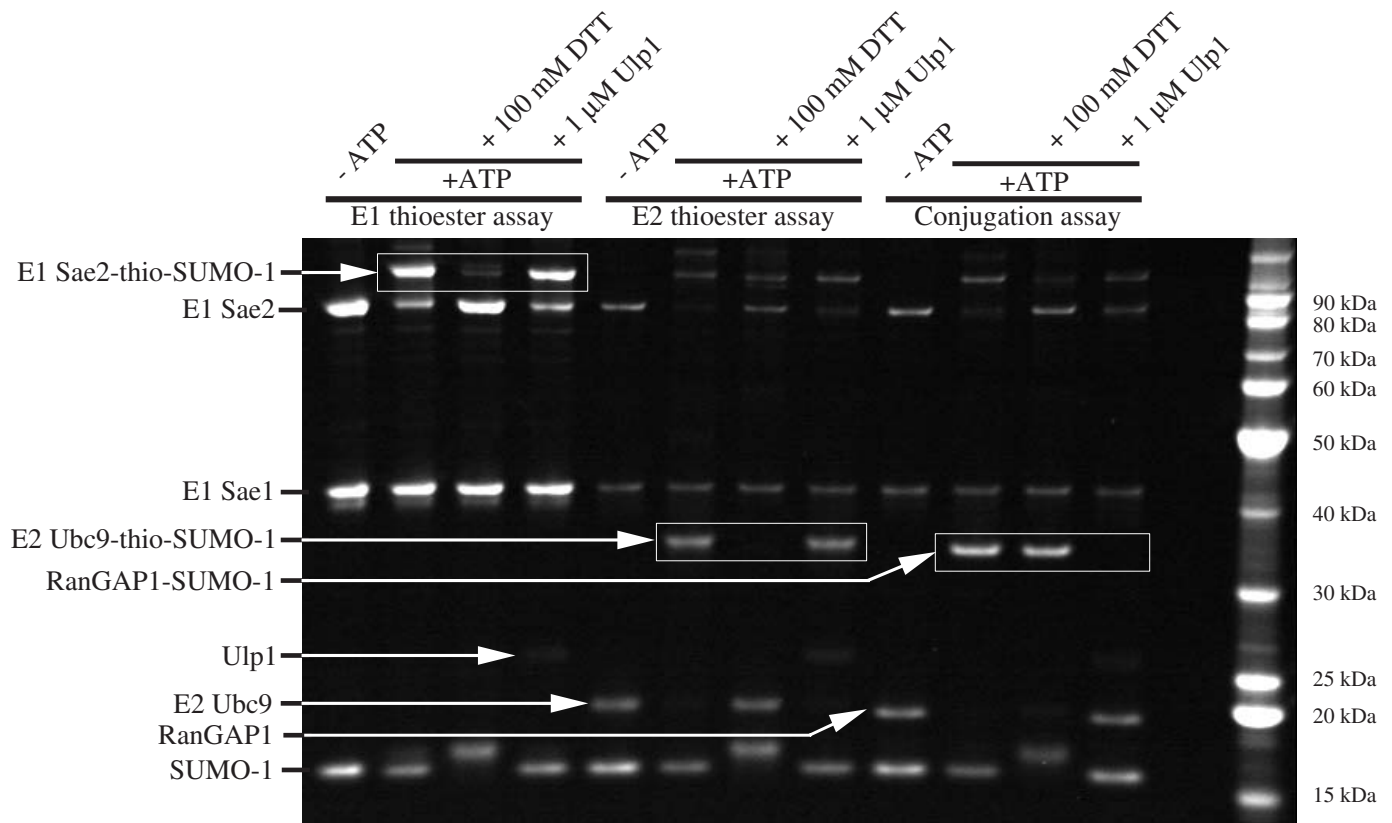

Supplemental Figure 2. SDS-PAGE analysis at 30 minutes for the time course assays used in Figures 2, 4, 5, and 6 to determine relative rates for the formation of adducts corresponding to E1-SUMO-1-thioester, E2-SUMO-1-thioester, and RanGAP1-SUMO-1 products. Reaction products are indicated with labels and arrows at the left of the figure. Molecular weight marker and corresponding apparent sizes are indicated at the right of the figure. Reaction products depicted in Figures 2, 4, 5, and 6 are indicated by boxed areas within the gel. Adduct sensitivity to DTT or Ulp1 was used to determine if the adducts represented thioester or conjugation products as indicated at the top of the gel. See Methods for assay details.
